# Supplementary material for: Different Innate and Adaptive Immune Responses to SARS-CoV-2 Infection of Asymptomatic, Mild, and Severe Cases
Source: PubMed Central journal article supplement (PMC7772470; doi:10.3389/fimmu.2020.610300), 2020-12-16
Supplement: DataSheet_1.pdf [file DataSheet_1.pdf]

**Supplementary Table 1: Characteristics of the study population****A**

| Study Group        | COVID-19 severe | COVID-19 mild | SARS-Cov-2 asymptomatic | SARS-Cov-2 contacts |
|--------------------|-----------------|---------------|-------------------------|---------------------|
| number of patients | 8               | 8             | 20                      | 28                  |
| age, median (IQRs) | 66 (52-82.5)    | 54 (48-63.5)  | 37 (34.3-46.8)          | 36.5 (32-48.5)      |
| sex (M/F)          | 6/2             | 5/3           | 4/16                    | 8/20                |

**B**

| Study Group                                     | COVID-19 ICU  | COVID-19 non-ICU |
|-------------------------------------------------|---------------|------------------|
| number of patients                              | 34            | 43               |
| age, median (IQRs)                              | 62 (55-73.25) | 69 (47-76)       |
| Day of analysis (from admission, median (IQRs)) | 2 (0.75-4.00) | 2 (1-3)          |

**Supplementary Table 2: Antibodies panel**

|                       | <b>Antibodies</b>             | <b>Source</b>                 | <b>Identifier</b> |
|-----------------------|-------------------------------|-------------------------------|-------------------|
| <b>T cell panel</b>   | CD45RA (Clone HI100) FITC     | BD Biosciences                | 555488            |
|                       | CCR7 (Clone CD197) PE         | BD Pharmingen                 | 566741            |
|                       | CD3 (Clone SK7) PerCP         | BD Biosciences                | 345766            |
|                       | CD4 (Clone RPA-T4) Pe-Cy7     | Immunological Sciences        | MAB-19522PC7      |
|                       | CD27 (Clone M-T271) APC       | BD Pharmingen                 | 558664            |
|                       | CD8 (Clone SK1) APC-Cy7       | BD Biosciences                | 348793            |
|                       | CD28 (Clone CD28.2) BV421     | BD Horizon                    | 562613            |
|                       | CD31 (Clone WM59) BV605       | BD Horizon                    | 562855            |
| <b>B cell panel</b>   | CD45 (Clone 2D1) V500         | BD Biosciences<br>B-cell tube | 626220            |
|                       | CD19 (Clone SJ25C1) PE-Cy7    |                               |                   |
|                       | CD24 (Clone ML5) PE           |                               |                   |
|                       | CD27 (Clone L128) APC         |                               |                   |
|                       | CD38 (Clone HIT2) PercP-Cy5.5 |                               |                   |
|                       | IgM (Clone G20-127) FITC      |                               |                   |
|                       | IgG (Clone G18-145) APC-H7    |                               |                   |
|                       | IgD (Clone IA6-2) V450        |                               |                   |
|                       | CD21 (Clone B-ly4) BV605      | BD OptiBuild                  | 740395            |
| <b>Monocyte panel</b> | CD45 (Clone 2D1) V500         | BD Biosciences                | 655873            |
|                       | CD3 (Clone UCHT1) BV605       | BD OptiBuild                  | 742623            |
|                       | CD14 (Clone M5E2) PE          | BD Pharmingen                 | 555398            |
|                       | CD16 (Clone LNK16) FITC       | Immunological Sciences        | MAB-1810F         |
|                       | CD4 (Clone RPA-T4) PE-Cy7     | Immunological Sciences        | MAB-19522PC7      |
|                       | CD8 (Clone SK1) APC-H7        | BD Biosciences                | 641400            |
|                       | CD38 (Clone HIT2) PerCP       | Immunological Sciences        | MAB-938PCP        |
|                       | HLA-DR (Clone L243) V450      | BD Biosciences                | 655874            |
|                       | CD33 (Clone P67.6) APC        | BD Biosciences                | 345800            |
| <b>NK cell panel</b>  | CD45 (Clone 2D1) V500         | BD Biosciences                | 655873            |
|                       | CD3 (Clone SK7) PerCP         | BD Biosciences                | 345766            |
|                       | CD4 (Clone RPA-T4) PE-Cy7     | Immunological Sciences        | MAB-19522PC7      |

|                               |                                  |                        |                 |
|-------------------------------|----------------------------------|------------------------|-----------------|
|                               | CD8 (Clone SK1) APC-H7           | BD Biosciences         | 641400          |
|                               | CD7 (Clone MEM-92) APC           | Immunological Sciences | MAB-1006A       |
|                               | CD56 (Clone MY31) PE             | BD Biosciences         | 345810          |
|                               | CD16 (Clone LNK16) FITC          | Immunological Sciences | MAB-1810F       |
| <b>Figure S7<br/>staining</b> | CD19 (Clone SJ25C1) BUV737       | BD Biosciences         | Cat#612757      |
|                               | CD24 (Clone ML5) BV711           | BD Biosciences         | Cat#563450      |
|                               | CD27 (Clone M-T271) PE           | BD Biosciences         | Cat#557330      |
|                               | CD38 (Clone HIT2) BV421          | BD Biosciences         | Cat#562445      |
|                               | IgM (Polyclonal) Alexa Fluor 647 | Jackson ImmunoResearch | Cat#109-606-129 |
|                               | IgD (Clone IA6-2) FITC           | BD Biosciences         | Cat#562023      |
|                               | IgG (Clone G18-145) BUV395       | BD Biosciences         | Cat#564229      |
|                               | IgA (Clone IS11-8E10) FITC       | Miltenyi Biotec        | Cat#130-113-475 |

**Supplementary Table 3: Monocytes mean and median values**

| <b>Patients group</b>           | <b>Contacts</b>                   | <b>Asymptomatic</b>               | <b>Mild</b>                       | <b>Severe</b>                     |
|---------------------------------|-----------------------------------|-----------------------------------|-----------------------------------|-----------------------------------|
|                                 | mean $\pm$ SD<br>median/IQR       | mean $\pm$ SD<br>median/IQR       | mean $\pm$ SD<br>median/IQR       | mean $\pm$ SD<br>median/IQR       |
| Monocytes<br>(% of lymphocytes) | 13.1 $\pm$ 6.1<br>11.9/8.2-17.8   | 13.3 $\pm$ 5.8<br>14.9/8.2-17.7   | 17.5 $\pm$ 6.2<br>15.6/12.9-20    | 37.1 $\pm$ 19.2<br>33/23-54.1     |
| Classical<br>(% monocytes)      | 55.1 $\pm$ 12.8<br>53.5/42.9-67.2 | 60.6 $\pm$ 10.2<br>62.1/54.6-67.9 | 57.8 $\pm$ 12.8<br>58.1/47.9-68.6 | 61.8 $\pm$ 19.8<br>70.3/46.2-76   |
| Intermediate<br>(% monocytes)   | 14.8 $\pm$ 8.5<br>13.6/7.6-23.1   | 13 $\pm$ 8.2<br>12.6/4.9-22       | 13.6 $\pm$ 10.6<br>8.9/7.8-24.3   | 23.3 $\pm$ 14.8<br>20.9/13.3-29.5 |
| Non Classical<br>(% monocytes)  | 12.1 $\pm$ 6.2<br>13.2/7.3-16.7   | 10.4 $\pm$ 5.4<br>11.4/4.8-14.2   | 13.1 $\pm$ 4.8<br>11.1/9.9-18.6   | 5 $\pm$ 5.7<br>3.1/0.6-10.1       |

**Supplementary Table 4: Monocytes total mean and median values**

| <b>Patients group</b>           | <b>Contacts</b>                  | <b>Asymptomatic</b>               | <b>Mild</b>                       | <b>Severe</b>                     |
|---------------------------------|----------------------------------|-----------------------------------|-----------------------------------|-----------------------------------|
|                                 | mean $\pm$ SD<br>median/IQR      | mean $\pm$ SD<br>median/IQR       | mean $\pm$ SD<br>median/IQR       | mean $\pm$ SD<br>median/IQR       |
| Monocytes<br>(% of lymphocytes) | 13.2 $\pm$ 5.1<br>11.8/10.2-16.4 | 15.1 $\pm$ 5.5<br>14.9/10.7-19.4  | 16.2 $\pm$ 4.3<br>16/14.1-18.2    | 29.8 $\pm$ 16<br>25.1/19-36.1     |
| Classical<br>(% monocytes)      | 48 $\pm$ 21.1<br>52.8/35.4-64    | 58.9 $\pm$ 16<br>62.9/50.1-72.3   | 61.9 $\pm$ 12.3<br>65.4/56.3-70.9 | 65.1 $\pm$ 19<br>71.8/44.7-77.3   |
| Intermediate<br>(% monocytes)   | 26.9 $\pm$ 17.5<br>22.4/14-35.4  | 20.3 $\pm$ 13.6<br>16.7/10.4-26.4 | 16.4 $\pm$ 11.3<br>13.2/9.7-15.6  | 21.8 $\pm$ 15.7<br>16.9/10.8-37.3 |
| Non Classical<br>(% monocytes)  | 7.1 $\pm$ 4.9<br>6.2/3.4-9.5     | 6.1 $\pm$ 3.7<br>5.9/3.5-7.8      | 6 $\pm$ 3.5<br>5.2/3.8-7.9        | 1.7 $\pm$ 2.4<br>0.3/0.1-3.4      |

**Supplementary Table 5: NK cells mean and median values**

| <b>Patients group</b>          | <b>Contacts</b>                   | <b>Asymptomatic</b>               | <b>Mild</b>                    | <b>Severe</b>                   |
|--------------------------------|-----------------------------------|-----------------------------------|--------------------------------|---------------------------------|
|                                | mean $\pm$ SD<br>median/IQR       | mean $\pm$ SD<br>median/IQR       | mean $\pm$ SD<br>median/IQR    | mean $\pm$ SD<br>median/IQR     |
| NK<br>(% of CD3-)              | 38.9 $\pm$ 14.2<br>36.5/29.2-47.8 | 38.8 $\pm$ 10.7<br>39.4/30.6-48.3 | 29 $\pm$ 9.3<br>27.8/22.5-38.9 | 14.6 $\pm$ 13.1<br>6.7/4.2-29.5 |
| Monocytes<br>(% of CD3-)       | 30.3 $\pm$ 9.9<br>29.7/23-38.6    | 28.5 $\pm$ 8.5<br>31.1/18.6-33.9  | 39.5 $\pm$ 8.5<br>42.7/33-46   | 62.3 $\pm$ 20.1<br>61/42.8-82   |
| Monocytes/NK<br>ratio          | 0.9 $\pm$ 0.6<br>0.9/0.5-1.2      | 0.8 $\pm$ 0.4<br>0.8/0.4-1        | 1.5 $\pm$ 0.6<br>1.4/1-1.9     | 10.6 $\pm$ 10.3<br>8.4/1.9-17.4 |
| Monocytes/Lymphocytes<br>ratio | 0.2 $\pm$ 0.09<br>0.1/0.09-0.2    | 0.2 $\pm$ 0.08<br>0.2/0.09-0.2    | 0.2 $\pm$ 0.1<br>0.2/0.1-0.3   | 0.8 $\pm$ 0.8<br>0.5/0.3-1.2    |

**Supplementary Table 6: NK cells total mean and median values**

| <b>Patients group</b>    | <b>Contacts</b>              | <b>Asymptomatic</b>            | <b>Mild</b>                   | <b>Severe</b>                     |
|--------------------------|------------------------------|--------------------------------|-------------------------------|-----------------------------------|
|                          | mean $\pm$ SD<br>median/IQR  | mean $\pm$ SD<br>median/IQR    | mean $\pm$ SD<br>median/IQR   | mean $\pm$ SD<br>median/IQR       |
| NK<br>(% of CD3-)        | 38.3 $\pm$ 13.5              | 41 $\pm$ 10.5                  | 29.3 $\pm$ 11.1               | 17.5 $\pm$ 12.7                   |
| Monocytes<br>(% of CD3-) | 32 $\pm$ 9.2<br>31/25.8-38.2 | 31.1 $\pm$ 8.7<br>32.2/24.6-38 | 39 $\pm$ 10.2<br>39.8/31.2-48 | 60.7 $\pm$ 17.1<br>57.2/47.8-70.4 |
| Monocytes/NK<br>ratio    | 1 $\pm$ 0.5<br>1.1/0.6-1.4   | 0.9 $\pm$ 0.5<br>0.8/0.5-1.1   | 1.6 $\pm$ 0.8<br>1.5/1-2.1    | 9.6 $\pm$ 11.7<br>3.8/2.3-14.4    |

**Supplementary Table 7: T cells mean and median values**

| <b>Patients group</b>                                 | <b>Contacts</b>               | <b>Asymptomatic</b>           | <b>Mild</b>                   | <b>Severe</b>                 |
|-------------------------------------------------------|-------------------------------|-------------------------------|-------------------------------|-------------------------------|
|                                                       | mean ± SD<br>median/IQR       | mean ± SD<br>median/IQR       | mean ± SD<br>median/IQR       | mean ± SD<br>median/IQR       |
| CD3+<br>(% of lymphocytes)                            | 70 ± 8.3<br>71.9/66-75.5      | 67.2 ± 8.1<br>66/62-71.2      | 69.2 ± 7.9<br>72/61.9-75.6    | 55.4 ± 16.1<br>56.7/43.1-70.4 |
| CD4+<br>(% of CD3+)                                   | 60 ± 11.7<br>59.9/53.1-70.1   | 62.3 ± 7.8<br>62/56.6-68.6    | 64.4 ± 8.8<br>62.2/56.9-74.4  | 66.4 ± 10.9<br>71.8/54.7-73.6 |
| CD4+ HLADR<br>(% of CD4+)                             | 5.3 ± 2.4<br>4.8/3.8-6.5      | 6.9 ± 3.9<br>6.6/3.9-9.5      | 7.1 ± 1.8<br>6.5/5.8-8.6      | 9.5 ± 3.4<br>8.8/6.6-12.6     |
| CD4+ central memory<br>(% of CD4+)                    | 42.7 ± 7.5<br>42/35.4-49.2    | 46.9 ± 8.9<br>48.6/41.7-52.7  | 50.3 ± 5.4<br>51.7/45.5-54    | 42.7 ± 12.3<br>42.9/34-51.5   |
| CD4+ effector memory<br>(% of CD4+)                   | 13.4 ± 6.2<br>13.8/8.7-16.2   | 14.2 ± 6.5<br>14.5/9.9-18.1   | 11.7 ± 4.1<br>13.2/13.8-9.2   | 13.3 ± 6.1<br>14.8/6.8-18.2   |
| CD4+ effector memory 1<br>(% of CD4+ effector memory) | 61.4 ± 14.5<br>59.9/49.3-75.6 | 59 ± 13.4<br>61.5/54.8-67     | 55.7 ± 14.8<br>59.3/50.3-64.7 | 54.6 ± 16.3<br>52.8/46.2-66.3 |
| CD4+ effector memory 2<br>(% of CD4+ effector memory) | 0.9 ± 2<br>04./0.1-0.7        | 2.1 ± 2.4<br>1.4/0.4-2.9      | 0.5 ± 0.6<br>0.2/0.1-0.9      | 0.5 ± 0.5<br>0.3/0.2-0.7      |
| CD4+ effector memory 3<br>(% of CD4+ effector memory) | 9.1 ± 9.5<br>5.7/1.2-13.7     | 11.7 ± 16.8<br>6.9/0.7-14.9   | 10.7 ± 12.9<br>7.9/1.2-13.6   | 14.4 ± 10.7<br>14/4.3-25.8    |
| CD4+ effector memory 4<br>(% of CD4+ effector memory) | 28.7 ± 9<br>26.5/21.3-38.5    | 27.2 ± 6.3<br>27.9/23.2-31    | 33.1 ± 6.3<br>32.5/30.3-35    | 30.5 ± 14.2<br>28/18.5-41     |
| CCR7+ CD45RA+<br>(% of CD4+)                          | 39.3 ± 11.3<br>38.8/33-45.5   | 34.2 ± 10.6<br>35.5/27.9-39.6 | 31.9 ± 6.6<br>29.5/26.4-36.9  | 39.3 ± 16.7<br>35.8/26.1-51.4 |
| CCR7+ CD45RA+ CD31-<br>(% of CD4+ naive)              | 35.7 ± 12.6<br>36/25.3-43.7   | 34.9 ± 10.3<br>33.7/27.9-40.2 | 48.1 ± 17.1<br>46.9/34.5-62   | 57.3 ± 14.5<br>54.4/44.4-71.8 |
| CCR7+ CD45RA+ CD31+<br>(% of CD4+ CCR7+ CD45RA+)      | 62.9 ± 13.1<br>62.8/55.4-74.4 | 63 ± 11.4<br>64.8/56.5-70     | 46.6 ± 14.6<br>49.2/35-55.5   | 42.4 ± 14.5<br>45.4/28.1-54.6 |
| CD4+ TEMRA<br>(% of CD4+)                             | 1.7 ± 2.4<br>0.6/0.2-2.4      | 2 ± 3.5<br>0.5/0.2-1.7        | 2.7 ± 3.1<br>1.2/0.2-5.2      | 1.7 ± 1.8<br>1.4/0.2-2.7      |
| CD8+<br>(% of CD3+)                                   | 31.6 ± 10.3<br>30.8/23.3-38.6 | 28.9 ± 7.2<br>27.4/24-34.2    | 28.9 ± 6.6<br>29.6/22.2-35.3  | 27.8 ± 9.3<br>24.4/22.8-34.5  |
| CD8+ HLADR<br>(% of CD8+)                             | 14 ± 9.8<br>11.2/7.5-20.4     | 19.5 ± 12.1<br>16.1/10.9-27.1 | 14.3 ± 5.9<br>14.3/9.2-20.4   | 45.1 ± 17.5<br>44.7/27.5-63.2 |
| CD8+ central memory<br>(% of CD8+)                    | 7.7 ± 4.7<br>6.6/4.4-11.3     | 10.8 ± 5.2<br>10.3/7.8-12.6   | 11.8 ± 6.2<br>10.9/7.3-12.8   | 7.5 ± 5.1<br>6.7/2.8-12       |
| CD8+ effector memory<br>(% of CD8+)                   | 14.7 ± 7.1<br>13.4/9-19       | 19.6 ± 8.7<br>19.1/13.8-23    | 13.7 ± 6.2<br>12.4/9.1-20.4   | 17.5 ± 10.1<br>18.7/6.8-27.7  |
| CD8+ effector memory 1<br>(% of CD8+ effector memory) | 67 ± 13.7<br>67.7/60.7-76     | 62.8 ± 14.8<br>66.2/55.2-74.4 | 66.2 ± 11.4<br>65.8/55.2-78.2 | 56.7 ± 21.6<br>57.1/38.1-76.7 |
| CD8+ effector memory 2<br>(% of CD8+ effector memory) | 13.2 ± 8.8<br>9.8/6.2-21.7    | 15.8 ± 10.1<br>15.2/8.2-25.2  | 11.2 ± 9.9<br>8.7/4.8-13.3    | 34.6 ± 23.5<br>36.8/13.1-47.9 |
| CD8+ effector memory 3<br>(% of CD8+ effector memory) | 10.1 ± 9.4<br>7.2/3.3-13.8    | 12.2 ± 14.1<br>9.7/4.1-12.6   | 9.2 ± 7.3<br>6.4/3.2-15.8     | 5.9 ± 5.8<br>4/2-11.9         |
| CD8+ effector memory 4<br>(% of CD8+ effector memory) | 9.7 ± 5.8<br>8.6/5-15.3       | 9.2 ± 5.1<br>7.9/6-10.6       | 13.4 ± 5.8<br>12.1/8-18.7     | 2.7 ± 2.6<br>1.8/0.5-5.5      |
| CCR7+ CD45RA+<br>(% of CD8+)                          | 35.8 ± 15.5<br>36.4/22.9-48.4 | 35.3 ± 14.7<br>39/19.9-43.3   | 29.9 ± 8.4<br>30.7/21.5-38.2  | 16.8 ± 8.5<br>17.4/9.1-23.5   |
| CCR7+ CD45RA+ CD31-<br>(% of CD8+ CCR7+ CD45RA+)      | 5.3 ± 3.2<br>5.1/3.8-5.9      | 5.8 ± 4.4<br>4.8/3.3-6.2      | 6.6 ± 2.8<br>6.4/4.9-7.9      | 12.4 ± 9.1<br>10.3/4.2-19     |
| CCR7+ CD45RA+ CD31+<br>(% of CD8+ CCR7+ CD45RA+)      | 90.4 ± 5.6<br>93.1/85.1-94.1  | 89.2 ± 6.3<br>90/87-93.6      | 79.2 ± 10.5<br>80.8/68-88.9   | 85.3 ± 9<br>87.3/78.3-92.2    |
| CD8+ TEMRA<br>(% of CD8+)                             | 37.5 ± 20.2<br>30.8/20.6-57.2 | 29.7 ± 12.3<br>28.8/21-40.2   | 40 ± 14.3<br>45.5/31.3-51     | 55.2 ± 22.7<br>52.6/36-76.9   |



**Supplementary Table 8: T cells total mean and median values**

| Patients group                                        | Contacts                      | Asymptomatic                  | Mild                          | Severe                        |
|-------------------------------------------------------|-------------------------------|-------------------------------|-------------------------------|-------------------------------|
|                                                       | mean ± SD<br>median/IQR       | mean ± SD<br>median/IQR       | mean ± SD<br>median/IQR       | mean ± SD<br>median/IQR       |
| CD3+<br>(% of lymphocytes)                            | 70.3 ± 7.8<br>71.9/68.1-75.2  | 64 ± 8.3<br>63.3/59.1-69.1    | 72 ± 6.1<br>73.2/67.8-76.6    | 62 ± 16.3<br>66.6/53.6-74.2   |
| CD4+<br>(% of CD3+)                                   | 56.9 ± 11.8<br>58.1/47.4-64.2 | 61 ± 8.4<br>61.8/56.4-68.1    | 64.2 ± 7.2<br>62.3/58.7-70.6  | 64.9 ± 9.2<br>68.3/56.2-73.3  |
| CD4+ HLADR<br>(% of CD4+)                             | 4 ± 1.9<br>3.1/2.6-4.8        | 4.4 ± 1.9<br>4.1/3.1-5.6      | 4.7 ± 1.1<br>4.6/3.8-5.4      | 5.5 ± 2.6<br>4.9/3.5-7.3      |
| CD4+ central memory<br>(% of CD4+)                    | 34.3 ± 8.5<br>35.6/29.9-41.2  | 41.2 ± 7.5<br>40.9/37.3-46.4  | 38.9 ± 7.6<br>38.3/33.9-44.3  | 42.7 ± 10.4                   |
| CD4+ effector memory<br>(% of CD4+)                   | 18.2 ± 8<br>17.7/13.2-23.9    | 19.7 ± 6.9<br>21.1/13.9-24.1  | 20.4 ± 7.9<br>20.1/14.6-25.7  | 17.9 ± 8.7<br>15.4/11.9-24.1  |
| CD4+ effector memory 1<br>(% of CD4+ effector memory) | 63.2 ± 13.5<br>62.3/54.9-75.2 | 64.9 ± 10.5<br>66.7/60.4-73.2 | 56.3 ± 18.7<br>63.3/54.4-67.6 | 61.4 ± 17.2<br>65.4/51.1-75.6 |
| CD4+ effector memory 2<br>(% of CD4+ effector memory) | 0.5 ± 0.9<br>0.3/0.1-0.6      | 0.7 ± 1.1<br>0.2/0.1-0.6      | 0.6 ± 1<br>0.2/0.07-0.6       | 0.5 ± 0.4<br>0.5/0.2-1        |
| CD4+ effector memory 3<br>(% of CD4+ effector memory) | 7.8 ± 9.3<br>3.6/0.7-12.1     | 7.3 ± 10.2<br>4.2/0.3-9.8     | 11.1 ± 14.3<br>5.3/3.3-9.3    | 9.1 ± 7.5<br>7.7/2.3-16.4     |
| CD4+ effector memory 4<br>(% of CD4+ effector memory) | 28.5 ± 8.2<br>26.3/22.4-36.8  | 27.2 ± 5.1<br>26.3/23.7-31.2  | 32 ± 6.7<br>31.3/27.8-35.4    | 29 ± 14.2<br>23.6/19.8-34.5   |
| CCR7+ CD45RA+<br>(% of CD4+)                          | 41.4 ± 11.9<br>40.3/34.1-50.6 | 34.2 ± 11.2<br>35.8/24.8-42.8 | 32.6 ± 9.1<br>34.9/25.6-40.4  | 40.3 ± 14.7<br>36.3/28.1-52   |
| CCR7+ CD45RA+ CD31-<br>(% of CD4+ naive)              | 37.6 ± 14<br>36.2/26-46       | 33.2 ± 9<br>30.3/26.6-38      | 45.4 ± 16.3<br>42.1/32.3-60.8 | 56.3 ± 12.5<br>53.7/44.7-66.2 |
| CCR7+ CD45RA+ CD31+<br>(% of CD4+ CCR7+ CD45RA+)      | 60.8 ± 15.3<br>62.6/52.8-74   | 65.5 ± 9.6<br>67.5-61.8-72.4  | 52.7 ± 16.3<br>57.1/39-65.7   | 43.4 ± 12.5<br>46.3/33.4-54.7 |
| CD4+ TEMRA<br>(% of CD4+)                             | 3.2 ± 4.6<br>1.1/0.3-3.9      | 2 ± 3.1<br>0.7/0.3-2.2        | 5 ± 6.5<br>2.1/0.5-6.4        | 2.1 ± 1.8<br>2/0.4-3.3        |
| CD8+<br>(% of CD3+)                                   | 34.6 ± 10.3<br>33/26.6-42.6   | 28.5 ± 6.1<br>27.4/24-33.2    | 29.4 ± 5.9<br>31/23.6-33.8    | 28.6 ± 7.2<br>26.4/23.9-32.2  |
| CD8+ HLADR<br>(% of CD8+)                             | 7.9 ± 5.7<br>6.1/3.5-11.5     | 9.8 ± 5<br>9/6.7-12.6         | 7.3 ± 3.1<br>6.9/4.9-8.7      | 22.2 ± 12.8<br>20.1/9.5-34.6  |
| CD8+ central memory<br>(% of CD8+)                    | 7.1 ± 4.3<br>5.9/4.4-9        | 12.1 ± 6.3<br>11.6/7.6-15.9   | 10.1 ± 5.7<br>8.5/6.9-11.8    | 7.3 ± 4.4<br>5.4/3.2-10.7     |
| CD8+ effector memory<br>(% of CD8+)                   | 13 ± 6.9<br>11.8/7.4-16.7     | 16.9 ± 6.3<br>16.8/13-21.7    | 12.2 ± 5.5<br>10.6/7.7-16.9   | 15.6 ± 8.5<br>14.5/8.5-23.6   |
| CD8+ effector memory 1<br>(% of CD8+ effector memory) | 64.1 ± 13.8<br>64.2/50.9-73.7 | 72.4 ± 13.8<br>74.7/65.4-83.9 | 69.7 ± 12.1<br>70.1/62.5-79.1 | 62.5 ± 24.8<br>67.3/40.4-86.3 |
| CD8+ effector memory 2<br>(% of CD8+ effector memory) | 13.6 ± 9.6<br>10.1/6.5-22.3   | 10.4 ± 9.8<br>8.7/0.7-18.5    | 6.2 ± 7.8<br>4.5/0.1-9.3      | 22.3 ± 23.1<br>12.4/2.6-45.8  |
| CD8+ effector memory 3<br>(% of CD8+ effector memory) | 10.1 ± 9.2<br>7.3/3.3-13.4    | 6.5 ± 9.7<br>4.4/0.2-9        | 6.1 ± 8<br>2.9/0.2-9.4        | 10.6 ± 17.2<br>3.5/0.5-14.5   |
| CD8+ effector memory 4<br>(% of CD8+ effector memory) | 12.1 ± 10.2<br>8.8/4.4-16.3   | 10.7 ± 4.9<br>10.7/7.1-13.9   | 18 ± 13.1<br>16.3/8.3-21.4    | 4.6 ± 3.2<br>5.9/1.3-6.9      |
| CCR7+ CD45RA+<br>(% of CD8+)                          | 33.7 ± 14.9<br>34.3/22.1-44   | 30.4 ± 11.5<br>29.6/20.4-38.8 | 28.2 ± 8.8<br>31/18.7-35.4    | 19.6 ± 11.9<br>18.4/9.2-25.4  |
| CCR7+ CD45RA+ CD31-<br>(% of CD8+ CCR7+ CD45RA+)      | 4.1 ± 3<br>3.6/2-5            | 4.8 ± 3.3<br>3.9/2.8-5.3      | 5.3 ± 2.9<br>4.6/3.2-7.2      | 9.7 ± 8<br>7.3/3.1-15.6       |
| CCR7+ CD45RA+ CD31+<br>(% of CD8+ CCR7+ CD45RA+)      | 92.5 ± 6<br>95/89-96.4        | 91.7 ± 5.7<br>93.9/90.1-95.8  | 89.7 ± 6.3<br>90.2/86.9-94.4  | 88.3 ± 8.3<br>90.8/83.2-94.9  |
| CD8+ TEMRA<br>(% of CD8+)                             | 40.3 ± 20.6<br>36.1/22.6-57.3 | 33.1 ± 9.5<br>31.1/27.8-40.9  | 43.7 ± 16.7<br>42.9/35.3-54.3 | 51.8 ± 19.7<br>43.6/35.8-71.3 |

**Supplementary Table 9: B cells mean and median values**

| <b>Patients group</b>                             | <b>Contacts</b>               | <b>Asymptomatic</b>           | <b>Mild</b>                   | <b>Severe</b>                 |
|---------------------------------------------------|-------------------------------|-------------------------------|-------------------------------|-------------------------------|
|                                                   | mean ± SD<br>median/IQR       | mean ± SD<br>median/IQR       | mean ± SD<br>median/IQR       | mean ± SD<br>median/IQR       |
| B cells<br>(% of lymphocytes)                     | 7.2 ± 2.3<br>7.2/5.3-8.5      | 8.4 ± 3.7<br>8.3/6.1-9.4      | 9.1 ± 4.4<br>9.3/5.8-10.6     | 5.6 ± 6.3<br>2.9/1.4-8        |
| B transitional<br>(% of B cells)                  | 4.6 ± 2.6<br>4.3/2.5-6.2      | 5.7 ± 3.2<br>4.3/3-9          | 4.8 ± 2.7<br>4.5/2.7-5.8      | 3.2 ± 2.5<br>2.8/0.9-5        |
| Naive B cells<br>(% of B cells)                   | 52.3 ± 16.8<br>50/45.4-64.8   | 55 ± 17.2<br>56.6/49.3-68.9   | 54.1 ± 12.3<br>55.3/52.7-63.2 | 52.4 ± 25.1<br>58.4/30.1-73.9 |
| Memory B cells<br>(% of B cells)                  | 40.7 ± 15.4<br>41.3/29.7-47.2 | 38.7 ± 16.4<br>35.7/25.3-46.3 | 39.8 ± 10.2<br>37.8/32.4-41.2 | 32.4 ± 19.6<br>32/15.8-52.1   |
| Atypical memory B cells<br>(% of B cells)         | 3.1 ± 2.1<br>2.8/1.3-4.4      | 2.7 ± 2<br>2.4/1.1-4.1        | 3.2 ± 4.4<br>2/0.7-3          | 4.5 ± 4.2<br>2.3/1.5-8.7      |
| Plasmablasts<br>(% of B cells)                    | 2.1 ± 3<br>1/0.6-2.4          | 1.9 ± 1.3<br>1.7/0.8-2.9      | 1.8 ± 1.5<br>1.8/0.5-2.2      | 8 ± 7.9<br>5.3/3.3-10.8       |
| IgM memory B cells<br>(% of memory B cells)       | 49.8 ± 14.8<br>46.4/41.2-57.3 | 54.1 ± 17.3<br>56.9/42.4-65.9 | 61.1 ± 14<br>59.5/52.3-71.4   | 37.7 ± 19<br>35.5/19.3-54.4   |
| Switched memory B cells<br>(% of memory B cells)  | 48.7 ± 15.2<br>52.6/40.8-58   | 43.5 ± 17.7<br>40/30.8-56.3   | 37.3 ± 14.3<br>39.3/27-46.3   | 60 ± 18.9<br>61.1/44.4-78.3   |
| IgG memory B cells<br>(% of memory B cells)       | 22.7 ± 8.9<br>23.6/15.8-29.6  | 16.7 ± 10.1<br>14.5/11.8-20.1 | 12.9 ± 6<br>13.9/6.9-18.5     | 19.9 ± 6.8<br>18/14.2-27.7    |
| IgG- IgM- memory B cells<br>(% of memory B cells) | 21.8 ± 8.2<br>22.3/16.8-26    | 19.5 ± 9.4<br>16.1/12.2-26.5  | 20 ± 6.3<br>19.6/16.1-24.2    | 32.3 ± 10.2<br>31.5/26.8-42.3 |

**Supplementary Table 10: B cells total mean and median values**

| <b>Patients group</b>                             | <b>Contacts</b>               | <b>Asymptomatic</b>           | <b>Mild</b>                   | <b>Severe</b>                 |
|---------------------------------------------------|-------------------------------|-------------------------------|-------------------------------|-------------------------------|
|                                                   | mean ± SD<br>median/IQR       | mean ± SD<br>median/IQR       | mean ± SD<br>median/IQR       | mean ± SD<br>median/IQR       |
| B cells<br>(% of lymphocytes)                     | 7.1 ± 2.3<br>7.2/5.3-8.3      | 8.7 ± 2.4<br>8.6/7.3-9.8      | 8.6 ± 4.2<br>8.4/5.9-10.5     | 6.3 ± 5.4<br>6.1/2.2-8.3      |
| B transitional<br>(% of B cells)                  | 3.6 ± 2.6<br>3.5/1-5.2        | 6.2 ± 4.7<br>4.9/2.6-9.2      | 4.8 ± 3.6<br>4.3/1.8-6.2      | 2.5 ± 1.9<br>1.7/1-4.2        |
| Naive B cells<br>(% of B cells)                   | 41.1 ± 14<br>40.9/31.3-49.8   | 53.4 ± 17.2<br>54/44.2-66.4   | 44.5 ± 15.2<br>49.5/33.1-55.1 | 48.7 ± 21.8<br>54.4/33.8-64.4 |
| Memory B cells<br>(% of B cells)                  | 35.4 ± 12<br>35.6/26.7-41.1   | 28.7 ± 16<br>24.9/18.9-33.3   | 36.4 ± 8<br>36.2/30.5-39.4    | 30.8 ± 17.2<br>27.3/15.6-42   |
| Atypical memory B cells<br>(% of B cells)         | 3.6 ± 2.1<br>3.4/1.8-5.2      | 2.6 ± 2<br>1.9/1.2-3.4        | 3.1 ± 2.5<br>2.3/1.4-3.9      | 3.2 ± 2.5<br>2.3/1.6-4.8      |
| Plasmablasts<br>(% of B cells)                    | 1.9 ± 2.4<br>1/0.6-2.2        | 1.5 ± 0.9<br>1.3/0.9-1.8      | 1.6 ± 1.1<br>1.1/0.9-1.9      | 5.9 ± 4.7<br>4.6/3-6.8        |
| IgM memory B cells<br>(% of memory B cells)       | 47.6 ± 10.2<br>47.3/40.5-53.6 | 48.4 ± 11.5<br>49.8/39-55.4   | 61.4 ± 12.6<br>64.3/50.2-69.8 | 44.2 ± 20.5<br>47/22.8-64.5   |
| Switched memory B cells<br>(% of memory B cells)  | 44.6 ± 14.4<br>46.6/36.6-54.1 | 43.2 ± 13.6<br>42.4/33.4-52.7 | 33.2 ± 13.6<br>33.9/25.4-44.5 | 53 ± 21.4<br>51.3/32.7-75     |
| IgG memory B cells<br>(% of memory B cells)       | 19.3 ± 8.4<br>18.4/15.1-24.1  | 17.1 ± 7.6<br>17.3/11-22.7    | 10.7 ± 6.7<br>10.3/5.8-14.8   | 15.3 ± 8.8<br>14.9/8.8-22.1   |
| IgG- IgM- memory B cells<br>(% of memory B cells) | 22.7 ± 9.5<br>21.7/17.4-27.4  | 23 ± 10.8<br>21.6/15.3-28.2   | 20.4 ± 8.6<br>20.6/15.3-26    | 34.6 ± 15.7<br>32.4/23.7-43.2 |
